# Supplementary material for: Implementation and Evaluation of a National Multidisciplinary Kidney Genetics Clinic Network Over 10 Years
Source: PubMed Central journal article supplement — Kidney Int Rep. 2024 May 9;9(8):2372–85. doi: 10.1016/j.ekir.2024.04.068 (PMC11328548; doi:10.1016/j.ekir.2024.04.068), 2024-05-09
Supplement: mmc1.pdf [file mmc1.pdf]

**Supplementary Table S1: Patient recruitment by state and year stratification.**

| Year          | State |    |     |    |     |     |    |
|---------------|-------|----|-----|----|-----|-----|----|
|               | NSW   | NT | QLD | SA | TAS | VIC | WA |
| 2013          | 5     | 0  | 15  | 0  | 0   | 9   | 0  |
| 2014          | 30    | 0  | 46  | 0  | 0   | 7   | 0  |
| 2015          | 18    | 0  | 52  | 0  | 0   | 7   | 0  |
| 2016          | 54    | 0  | 75  | 8  | 0   | 43  | 0  |
| 2017          | 60    | 0  | 94  | 14 | 0   | 139 | 0  |
| 2018          | 50    | 0  | 76  | 27 | 0   | 126 | 15 |
| 2019          | 36    | 1  | 49  | 11 | 5   | 18  | 5  |
| 2020          | 0     | 0  | 0   | 0  | 0   | 0   | 4  |
| 2021          | 42    | 0  | 39  | 14 | 0   | 15  | 17 |
| 2022          | 17    | 0  | 38  | 9  | 0   | 13  | 14 |
| *Year unknown | 87    | 1  | 51  | 14 | 0   | 24  | 12 |
| Total number  | 399   | 2  | 535 | 97 | 5   | 401 | 67 |

The table includes all patients with and without genomic testing (N=1506). NSW, New South Wales; NT, Northern Territory; QLD, Queensland; SA, South Australia; TAS, Tasmania; VIC, Victoria; WA, Western Australia. Note: \*There were limitations in the data collection process, as it relied on information provided by multiple clinicians from various renal genetics clinics. This resulted in challenges obtaining complete data, such as missing “year of recruitment” information.

**Supplementary Table S2:** Occurrence of genes affected by pathogenic/likely pathogenic variants in patients with different kidney diagnoses.

| <b>Diagnosis</b> | <b>Subgroup</b> | <b>Gene</b>     | <b>Occurrence</b> | <b>Percent</b> |
|------------------|-----------------|-----------------|-------------------|----------------|
| Tubulopathy      |                 | <i>SLC12A1</i>  | 2                 | 0.26           |
|                  |                 | <i>SLC12A3</i>  | 23                | 2.96           |
|                  |                 | <i>SLC7A9</i>   | 3                 | 0.39           |
|                  |                 | <i>ATP6V0A4</i> | 2                 | 0.26           |
|                  |                 | <i>AVPR2</i>    | 2                 | 0.26           |
|                  |                 | <i>OCRL</i>     | 1                 | 0.13           |
|                  |                 | <i>SLC4A1</i>   | 9                 | 1.16           |
|                  |                 | <i>PHEX</i>     | 1                 | 0.13           |
|                  |                 | <i>CLCN5</i>    | 5                 | 0.64           |
|                  |                 | <i>CASR</i>     | 3                 | 0.39           |
|                  |                 | <i>CACNAIS</i>  | 1                 | 0.13           |
|                  |                 | <i>KCNJ1</i>    | 2                 | 0.26           |
|                  |                 | <i>SCN4A</i>    | 1                 | 0.13           |
|                  |                 | <i>CLCNKB</i>   | 2                 | 0.26           |
|                  |                 | <i>CLDN16</i>   | 2                 | 0.26           |
|                  |                 | <i>ATP6V1B1</i> | 3                 | 0.39           |
|                  |                 | <i>APRT</i>     | 2                 | 0.26           |
|                  |                 | <i>REN</i>      | 1                 | 0.13           |
|                  |                 | <i>AGTX</i>     | 3                 | 0.39           |
|                  |                 | <i>AQP2</i>     | 1                 | 0.13           |
|                  |                 | <i>GRHPR</i>    | 1                 | 0.13           |
|                  |                 | <i>SCNN1A</i>   | 1                 | 0.13           |
|                  |                 | <i>CLDN10</i>   | 1                 | 0.13           |
|                  |                 | <i>HNF4A</i>    | 1                 | 0.13           |
|                  | <i>HOGA1</i>    | 1               | 0.13              |                |
|                  | <i>PHEX</i>     | 1               | 0.13              |                |
| Glomerular       | Nephrotic       | <i>LMX1B</i>    | 2                 | 0.26           |
|                  |                 | <i>INF2</i>     | 3                 | 0.39           |
|                  |                 | <i>NUP107</i>   | 1                 | 0.13           |
|                  |                 | <i>CD2AP</i>    | 1                 | 0.13           |
|                  |                 | <i>COQ8B</i>    | 2                 | 0.26           |
|                  |                 | <i>TTC21B</i>   | 1                 | 0.13           |
|                  |                 | <i>COL4A5</i>   | 2                 | 0.26           |
|                  |                 | <i>NPHS1</i>    | 7                 | 0.90           |
|                  |                 | <i>ALMS1</i>    | 1                 | 0.13           |
|                  |                 | <i>FAT1</i>     | 2                 | 0.26           |
|                  |                 | <i>SETD5</i>    | 1                 | 0.13           |
|                  |                 | <i>CUBN</i>     | 4                 | 0.52           |
|                  | <i>CLCN5</i>    | 2               | 0.26              |                |

|  |                |                   |    |      |
|--|----------------|-------------------|----|------|
|  |                | <i>LAMA5</i>      | 2  | 0.26 |
|  |                | <i>MEFV</i>       | 1  | 0.13 |
|  |                | <i>FN1</i>        | 1  | 0.13 |
|  |                | <i>chr16del</i>   | 1  | 0.13 |
|  |                | <i>NPHS2</i>      | 10 | 1.29 |
|  |                | <i>ch17q12dup</i> | 1  | 0.13 |
|  |                | <i>PKHD1</i>      | 1  | 0.13 |
|  |                | <i>LAMB2</i>      | 3  | 0.39 |
|  |                | <i>COL4A1</i>     | 1  | 0.13 |
|  |                | <i>ANLN</i>       | 1  | 0.13 |
|  |                | <i>ACTN4</i>      | 3  | 0.39 |
|  |                | <i>TRPC6</i>      | 3  | 0.39 |
|  |                | <i>PLCE1</i>      | 1  | 0.13 |
|  |                | <i>SMARCAL1</i>   | 1  | 0.13 |
|  |                | <i>TSC1</i>       | 1  | 0.13 |
|  |                | <i>MYO1E</i>      | 1  | 0.13 |
|  |                | <i>COL4A3</i>     | 5  | 0.64 |
|  |                | <i>FAN1</i>       | 1  | 0.13 |
|  |                | <i>ALMS1</i>      | 1  | 0.13 |
|  |                | <i>SLC3A1</i>     | 1  | 0.13 |
|  |                | <i>CD46</i>       | 1  | 0.13 |
|  |                | <i>COL4A4</i>     | 2  | 0.26 |
|  |                | <i>COL4A5</i>     | 1  | 0.13 |
|  |                | <i>ARHGAP24</i>   | 1  | 0.13 |
|  |                | <i>ITGB4</i>      | 1  | 0.13 |
|  |                | <i>SAMD9</i>      | 1  | 0.13 |
|  |                | <i>CLCNKB</i>     | 1  | 0.13 |
|  |                | <i>LMX1b</i>      | 1  | 0.13 |
|  |                | <i>PLCE1</i>      | 1  | 0.13 |
|  |                | <i>TRPC6</i>      | 1  | 0.13 |
|  |                | <i>WT1</i>        | 1  | 0.13 |
|  | Glomerulopathy | <i>CFHR5</i>      | 1  | 0.13 |
|  |                | <i>COL4A4</i>     | 7  | 0.90 |
|  |                | <i>FN1</i>        | 2  | 0.26 |
|  |                | <i>COL4A5</i>     | 5  | 0.64 |
|  |                | <i>MYH9</i>       | 1  | 0.13 |
|  |                | <i>COL4A3</i>     | 3  | 0.39 |
|  |                | <i>FAT1</i>       | 1  | 0.13 |
|  |                | <i>LRP5</i>       | 1  | 0.13 |
|  |                | <i>NUP93</i>      | 1  | 0.13 |
|  |                | <i>PLCE1</i>      | 1  | 0.13 |
|  |                | <i>TRPC6</i>      | 1  | 0.13 |

|                       |        |                    |     |       |
|-----------------------|--------|--------------------|-----|-------|
|                       |        | <i>MYO1E</i>       | 1   | 0.13  |
|                       | Alport | <i>COL4A4</i>      | 34  | 4.38  |
|                       |        | <i>COL4A5</i>      | 82  | 10.57 |
|                       |        | <i>COL4A3</i>      | 27  | 3.48  |
|                       |        | <i>COL4A1</i>      | 1   | 0.13  |
|                       |        | <i>UMOD</i>        | 3   | 0.39  |
|                       |        | <i>NPHS2</i>       | 1   | 0.13  |
|                       |        | <i>ACTN4</i>       | 1   | 0.13  |
|                       |        | <i>CLCN5</i>       | 2   | 0.26  |
|                       |        | <i>GATA3</i>       | 1   | 0.13  |
|                       |        | <i>CFHR5</i>       | 1   | 0.13  |
|                       |        | <i>CUBN</i>        | 1   | 0.13  |
|                       |        | <i>HNF1B</i>       | 1   | 0.13  |
|                       |        | <i>FAT1</i>        | 1   | 0.13  |
|                       |        | <i>PKD2</i>        | 2   | 0.26  |
|                       |        | <i>PKHD1</i>       | 2   | 0.26  |
|                       |        | <i>PKD1</i>        | 2   | 0.26  |
|                       |        | <i>RANCI</i>       | 1   | 0.13  |
|                       |        | <i>CFI</i>         | 1   | 0.13  |
| Cystic and Ciliopathy | Cystic | <i>PKD1</i>        | 138 | 17.78 |
|                       |        | <i>PKD2</i>        | 22  | 2.84  |
|                       |        | <i>ch17q12 CNV</i> | 1   | 0.13  |
|                       |        | <i>PKHD1</i>       | 41  | 5.28  |
|                       |        | <i>BRCA1</i>       | 1   | 0.13  |
|                       |        | <i>IFT140</i>      | 1   | 0.13  |
|                       |        | <i>HNF1B</i>       | 30  | 3.87  |
|                       |        | <i>COL4A1</i>      | 1   | 0.13  |
|                       |        | <i>CC2D2A</i>      | 1   | 0.13  |
|                       |        | <i>BBS1</i>        | 1   | 0.13  |
|                       |        | <i>DNAJB11</i>     | 3   | 0.39  |
|                       |        | <i>PRKCSH</i>      | 2   | 0.26  |
|                       |        | <i>TSC2</i>        | 4   | 0.52  |
|                       |        | <i>CTNS</i>        | 2   | 0.26  |
|                       |        | <i>WDR19</i>       | 1   | 0.13  |
|                       |        | <i>SLC4A1</i>      | 1   | 0.13  |
|                       |        | <i>ANKRD11</i>     | 1   | 0.13  |
|                       |        | <i>PRKCSH</i>      | 1   | 0.13  |
|                       |        | <i>SRCAP</i>       | 1   | 0.13  |
|                       |        | <i>MUC1</i>        | 1   | 0.13  |
|                       |        | <i>COL4A5</i>      | 1   | 0.13  |
|                       |        | <i>GANAB</i>       | 2   | 0.26  |
|                       |        | <i>OCRL</i>        | 1   | 0.13  |

|  |            |                |    |      |
|--|------------|----------------|----|------|
|  |            | <i>ALMS1</i>   | 1  | 0.13 |
|  |            | <i>BBS10</i>   | 2  | 0.26 |
|  |            | <i>TTC21B</i>  | 1  | 0.13 |
|  |            | <i>DYNC2H1</i> | 1  | 0.13 |
|  |            | <i>CEP290</i>  | 1  | 0.13 |
|  |            | <i>NOTCH2</i>  | 1  | 0.13 |
|  |            | <i>UMOD</i>    | 2  | 0.26 |
|  |            | <i>SEC63</i>   | 1  | 0.13 |
|  | Ciliopathy | <i>CEP83</i>   | 1  | 0.13 |
|  |            | <i>PKHD1</i>   | 2  | 0.26 |
|  |            | <i>TMEM67</i>  | 1  | 0.13 |
|  |            | <i>IFT172</i>  | 1  | 0.13 |
|  |            | <i>INVS</i>    | 2  | 0.26 |
|  |            | <i>BBS10</i>   | 1  | 0.13 |
|  |            | <i>NPHP1</i>   | 4  | 0.52 |
|  |            | <i>CTNS</i>    | 1  | 0.13 |
|  |            | <i>BBS2</i>    | 1  | 0.13 |
|  |            | <i>LRRC6</i>   | 1  | 0.13 |
|  |            | <i>UMOD</i>    | 2  | 0.26 |
|  |            | <i>UGT1A1</i>  | 1  | 0.13 |
|  |            | <i>IQCB1</i>   | 1  | 0.13 |
|  |            | <i>NPHP4</i>   | 6  | 0.77 |
|  |            | <i>RPS6KA3</i> | 1  | 0.13 |
|  |            | <i>AH11</i>    | 1  | 0.13 |
|  |            | <i>MKKS</i>    | 1  | 0.13 |
|  |            | <i>CEP164</i>  | 1  | 0.13 |
|  |            | <i>BBS7</i>    | 1  | 0.13 |
|  |            | <i>C5orf42</i> | 1  | 0.13 |
|  |            | <i>AH11</i>    | 1  | 0.13 |
|  |            | <i>CEP290</i>  | 2  | 0.26 |
|  |            | <i>TMEM67</i>  | 1  | 0.13 |
|  |            | <i>RMND1</i>   | 1  | 0.13 |
|  |            | <i>IFT140</i>  | 1  | 0.13 |
|  |            | <i>NPHP3</i>   | 1  | 0.13 |
|  | ADTKD      | <i>UMOD</i>    | 12 | 1.55 |
|  |            | <i>MUC1</i>    | 8  | 1.03 |
|  |            | <i>COL4A1</i>  | 1  | 0.13 |
|  |            | <i>COL4A4</i>  | 1  | 0.13 |
|  |            | <i>ADCY10</i>  | 1  | 0.13 |
|  |            | <i>NPHS2</i>   | 1  | 0.13 |
|  |            | <i>HNF1B</i>   | 1  | 0.13 |
|  |            | <i>PKD1</i>    | 1  | 0.13 |

|            |           |                 |   |      |
|------------|-----------|-----------------|---|------|
|            |           | <i>NPHP1</i>    | 1 | 0.13 |
|            |           | <i>BICC1</i>    | 1 | 0.13 |
|            |           | <i>FANI</i>     | 1 | 0.13 |
|            |           | <i>PKHD1</i>    | 1 | 0.13 |
| Complement |           | <i>CFHR1</i>    | 3 | 0.39 |
|            |           | <i>CD46</i>     | 2 | 0.26 |
|            |           | <i>C3</i>       | 6 | 0.77 |
|            |           | <i>CFI</i>      | 2 | 0.26 |
|            |           | <i>THBD</i>     | 7 | 0.90 |
|            |           | <i>CFH</i>      | 9 | 1.16 |
|            |           | <i>REN</i>      | 1 | 0.13 |
|            |           | <i>CFHR3</i>    | 2 | 0.26 |
|            |           | <i>ADAMTS13</i> | 1 | 0.13 |
|            |           | <i>PLG</i>      | 1 | 0.13 |
|            |           | <i>CFHR5</i>    | 2 | 0.26 |
|            |           | <i>CFB</i>      | 1 | 0.13 |
|            |           | <i>FLG</i>      | 1 | 0.13 |
| CAKUT      | Syndromic | <i>PAX2</i>     | 3 | 0.39 |
|            |           | <i>ROBO2</i>    | 1 | 0.13 |
|            |           | <i>GATA3</i>    | 1 | 0.13 |
|            |           | <i>STXBPI</i>   | 1 | 0.13 |
|            |           | <i>HDAC8</i>    | 1 | 0.13 |
|            |           | <i>FRAS1</i>    | 1 | 0.13 |
|            |           | <i>SALL1</i>    | 1 | 0.13 |
|            |           | <i>TTC21B</i>   | 1 | 0.13 |
|            |           | <i>EDNI</i>     | 1 | 0.13 |
|            |           | <i>EYA1</i>     | 2 | 0.26 |
|            |           | <i>JAG1</i>     | 1 | 0.13 |
|            | Isolated  | <i>JAG1</i>     | 1 | 0.13 |
|            |           | <i>KMT2D</i>    | 1 | 0.13 |
|            |           | <i>NPHP4</i>    | 1 | 0.13 |
|            |           | <i>BBS10</i>    | 1 | 0.13 |
|            |           | <i>FREMI</i>    | 1 | 0.13 |
|            |           | <i>ACE</i>      | 1 | 0.13 |
|            |           | <i>HNFB</i>     | 4 | 0.52 |
|            |           | <i>BMP4</i>     | 1 | 0.13 |
|            |           | <i>RET</i>      | 1 | 0.13 |
|            |           | <i>BICC1</i>    | 1 | 0.13 |
|            |           | <i>CHD1L</i>    | 1 | 0.13 |
|            |           | <i>FRAS1</i>    | 2 | 0.26 |
|            |           | <i>SALL1</i>    | 1 | 0.13 |
| Other      |           | <i>COL4A4</i>   | 1 | 0.13 |

|  |  |                  |   |      |
|--|--|------------------|---|------|
|  |  | <i>NPHP1</i>     | 2 | 0.26 |
|  |  | <i>WT1</i>       | 4 | 0.52 |
|  |  | <i>NPHS2</i>     | 1 | 0.13 |
|  |  | <i>NPHP3</i>     | 1 | 0.13 |
|  |  | <i>FLNA</i>      | 1 | 0.13 |
|  |  | <i>COL4A1</i>    | 1 | 0.13 |
|  |  | <i>MED13L</i>    | 1 | 0.13 |
|  |  | <i>UMOD</i>      | 1 | 0.13 |
|  |  | <i>COL4A5</i>    | 1 | 0.13 |
|  |  | <i>HNF1B del</i> | 1 | 0.13 |
|  |  | <i>MYH9</i>      | 1 | 0.13 |
|  |  | <i>FLCN</i>      | 1 | 0.13 |
|  |  | <i>APRT</i>      | 1 | 0.13 |
|  |  | <i>HOGA1</i>     | 1 | 0.13 |
|  |  | <i>AVPR2</i>     | 1 | 0.13 |
|  |  | <i>COL4A3</i>    | 2 | 0.26 |
|  |  | <i>PRKCSH</i>    | 1 | 0.13 |
|  |  | <i>DGKE</i>      | 1 | 0.13 |
|  |  | <i>AVPR2</i>     | 1 | 0.13 |
|  |  | <i>ANLN</i>      | 1 | 0.13 |

**Supplementary Table S3:** Genes listed in Kidneyome\_SuperPanel Version 8.53.

| <b>Entity Name</b> | <b>Entity Type</b> | <b>Gene Symbol</b> | <b>HGNC</b> |
|--------------------|--------------------|--------------------|-------------|
| ACE                | gene               | <i>ACE</i>         | HGNC:2707   |
| ACTG2              | gene               | <i>ACTG2</i>       | HGNC:145    |
| ACTN4              | gene               | <i>ACTN4</i>       | HGNC:166    |
| AFF3               | gene               | <i>AFF3</i>        | HGNC:6473   |
| AGT                | gene               | <i>AGT</i>         | HGNC:333    |
| AGTR1              | gene               | <i>AGTR1</i>       | HGNC:336    |
| AGXT               | gene               | <i>AGXT</i>        | HGNC:341    |
| AHI1               | gene               | <i>AHI1</i>        | HGNC:21575  |
| AIRE               | gene               | <i>AIRE</i>        | HGNC:360    |
| ALG5               | gene               | <i>ALG5</i>        | HGNC:20266  |
| ALG8               | gene               | <i>ALG8</i>        | HGNC:23161  |
| ALG9               | gene               | <i>ALG9</i>        | HGNC:15672  |
| ALMS1              | gene               | <i>ALMS1</i>       | HGNC:428    |
| ALPL               | gene               | <i>ALPL</i>        | HGNC:438    |
| AMMECR1            | gene               | <i>AMMECR1</i>     | HGNC:467    |
| AMN                | gene               | <i>AMN</i>         | HGNC:14604  |
| ANKS6              | gene               | <i>ANKS6</i>       | HGNC:26724  |
| ANOS1              | gene               | <i>ANOS1</i>       | HGNC:6211   |
| AP2S1              | gene               | <i>AP2S1</i>       | HGNC:565    |
| APOA1              | gene               | <i>APOA1</i>       | HGNC:600    |
| APOE               | gene               | <i>APOE</i>        | HGNC:613    |
| APRT               | gene               | <i>APRT</i>        | HGNC:626    |
| AQP2               | gene               | <i>AQP2</i>        | HGNC:634    |
| ARHGDI1A           | gene               | <i>ARHGDI1A</i>    | HGNC:678    |
| ARL13B             | gene               | <i>ARL13B</i>      | HGNC:25419  |
| ARL6               | gene               | <i>ARL6</i>        | HGNC:13210  |
| ATP1A1             | gene               | <i>ATP1A1</i>      | HGNC:799    |
| ATP6V0A4           | gene               | <i>ATP6V0A4</i>    | HGNC:866    |
| ATP6V1B1           | gene               | <i>ATP6V1B1</i>    | HGNC:853    |
| AVP                | gene               | <i>AVP</i>         | HGNC:894    |
| AVPR2              | gene               | <i>AVPR2</i>       | HGNC:897    |
| BBS1               | gene               | <i>BBS1</i>        | HGNC:966    |
| BBS10              | gene               | <i>BBS10</i>       | HGNC:26291  |
| BBS12              | gene               | <i>BBS12</i>       | HGNC:26648  |
| BBS2               | gene               | <i>BBS2</i>        | HGNC:967    |
| BBS4               | gene               | <i>BBS4</i>        | HGNC:969    |
| BBS5               | gene               | <i>BBS5</i>        | HGNC:970    |
| BBS7               | gene               | <i>BBS7</i>        | HGNC:18758  |
| BBS9               | gene               | <i>BBS9</i>        | HGNC:30000  |
| BCS1L              | gene               | <i>BCS1L</i>       | HGNC:1020   |



|         |      |                |            |
|---------|------|----------------|------------|
| BMP4    | gene | <i>BMP4</i>    | HGNC:1071  |
| BNC2    | gene | <i>BNC2</i>    | HGNC:30988 |
| BSND    | gene | <i>BSND</i>    | HGNC:16512 |
| C3      | gene | <i>C3</i>      | HGNC:1318  |
| CA2     | gene | <i>CA2</i>     | HGNC:1373  |
| CACNA1D | gene | <i>CACNA1D</i> | HGNC:1391  |
| CACNA1H | gene | <i>CACNA1H</i> | HGNC:1395  |
| CACNA1S | gene | <i>CACNA1S</i> | HGNC:1397  |
| CASR    | gene | <i>CASR</i>    | HGNC:1514  |
| CC2D2A  | gene | <i>CC2D2A</i>  | HGNC:29253 |
| CD151   | gene | <i>CD151</i>   | HGNC:1630  |
| CD2AP   | gene | <i>CD2AP</i>   | HGNC:14258 |
| CD46    | gene | <i>CD46</i>    | HGNC:6953  |
| CDC73   | gene | <i>CDC73</i>   | HGNC:16783 |
| CDKN1B  | gene | <i>CDKN1B</i>  | HGNC:1785  |
| CDX2    | gene | <i>CDX2</i>    | HGNC:1806  |
| CELSR3  | gene | <i>CELSR3</i>  | HGNC:3230  |
| CENPF   | gene | <i>CENPF</i>   | HGNC:1857  |
| CEP164  | gene | <i>CEP164</i>  | HGNC:29182 |
| CEP290  | gene | <i>CEP290</i>  | HGNC:29021 |
| CEP55   | gene | <i>CEP55</i>   | HGNC:1161  |
| CEP83   | gene | <i>CEP83</i>   | HGNC:17966 |
| CFB     | gene | <i>CFB</i>     | HGNC:1037  |
| CFH     | gene | <i>CFH</i>     | HGNC:4883  |
| CFHR1   | gene | <i>CFHR1</i>   | HGNC:4888  |
| CFHR2   | gene | <i>CFHR2</i>   | HGNC:4890  |
| CFHR3   | gene | <i>CFHR3</i>   | HGNC:16980 |
| CFHR5   | gene | <i>CFHR5</i>   | HGNC:24668 |
| CFI     | gene | <i>CFI</i>     | HGNC:5394  |
| CHD7    | gene | <i>CHD7</i>    | HGNC:20626 |
| CHRNA3  | gene | <i>CHRNA3</i>  | HGNC:1957  |
| CLCN2   | gene | <i>CLCN2</i>   | HGNC:2020  |
| CLCN5   | gene | <i>CLCN5</i>   | HGNC:2023  |
| CLCN5   | gene | <i>CLCN5</i>   | HGNC:2023  |
| CLCNKB  | gene | <i>CLCNKB</i>  | HGNC:2027  |
| CLDN10  | gene | <i>CLDN10</i>  | HGNC:2033  |
| CLDN16  | gene | <i>CLDN16</i>  | HGNC:2037  |
| CLDN19  | gene | <i>CLDN19</i>  | HGNC:2040  |
| CNNM2   | gene | <i>CNNM2</i>   | HGNC:103   |
| COL4A1  | gene | <i>COL4A1</i>  | HGNC:2202  |
| COL4A1  | gene | <i>COL4A1</i>  | HGNC:2202  |
| COL4A3  | gene | <i>COL4A3</i>  | HGNC:2204  |

|         |      |                |            |
|---------|------|----------------|------------|
| COL4A3  | gene | <i>COL4A3</i>  | HGNC:2204  |
| COL4A4  | gene | <i>COL4A4</i>  | HGNC:2206  |
| COL4A4  | gene | <i>COL4A4</i>  | HGNC:2206  |
| COL4A5  | gene | <i>COL4A5</i>  | HGNC:2207  |
| COL4A5  | gene | <i>COL4A5</i>  | HGNC:2207  |
| COQ2    | gene | <i>COQ2</i>    | HGNC:25223 |
| COQ6    | gene | <i>COQ6</i>    | HGNC:20233 |
| COQ8B   | gene | <i>COQ8B</i>   | HGNC:19041 |
| CPT2    | gene | <i>CPT2</i>    | HGNC:2330  |
| CRB2    | gene | <i>CRB2</i>    | HGNC:18688 |
| CRB2    | gene | <i>CRB2</i>    | HGNC:18688 |
| CSPP1   | gene | <i>CSPP1</i>   | HGNC:26193 |
| CTNS    | gene | <i>CTNS</i>    | HGNC:2518  |
| CTU2    | gene | <i>CTU2</i>    | HGNC:28005 |
| CUBN    | gene | <i>CUBN</i>    | HGNC:2548  |
| CUL3    | gene | <i>CUL3</i>    | HGNC:2553  |
| CYP11B1 | gene | <i>CYP11B1</i> | HGNC:2591  |
| CYP11B2 | gene | <i>CYP11B2</i> | HGNC:2592  |
| CYP17A1 | gene | <i>CYP17A1</i> | HGNC:2593  |
| CYP21A2 | gene | <i>CYP21A2</i> | HGNC:2600  |
| CYP24A1 | gene | <i>CYP24A1</i> | HGNC:2602  |
| CYP27B1 | gene | <i>CYP27B1</i> | HGNC:2606  |
| CYP2R1  | gene | <i>CYP2R1</i>  | HGNC:20580 |
| DAAM2   | gene | <i>DAAM2</i>   | HGNC:18143 |
| DCDC2   | gene | <i>DCDC2</i>   | HGNC:18141 |
| DGKE    | gene | <i>DGKE</i>    | HGNC:2852  |
| DGKE    | gene | <i>DGKE</i>    | HGNC:2852  |
| DHCR7   | gene | <i>DHCR7</i>   | HGNC:2860  |
| DLC1    | gene | <i>DLC1</i>    | HGNC:2897  |
| DLG5    | gene | <i>DLG5</i>    | HGNC:2904  |
| DMP1    | gene | <i>DMP1</i>    | HGNC:2932  |
| DNAJB11 | gene | <i>DNAJB11</i> | HGNC:14889 |
| DNAJB11 | gene | <i>DNAJB11</i> | HGNC:14889 |
| DYNC2H1 | gene | <i>DYNC2H1</i> | HGNC:2962  |
| DYRK1A  | gene | <i>DYRK1A</i>  | HGNC:3091  |
| DZIP1L  | gene | <i>DZIP1L</i>  | HGNC:26551 |
| EHHADH  | gene | <i>EHHADH</i>  | HGNC:3247  |
| ENPP1   | gene | <i>ENPP1</i>   | HGNC:3356  |
| EXOC3L2 | gene | <i>EXOC3L2</i> | HGNC:30162 |
| EYA1    | gene | <i>EYA1</i>    | HGNC:3519  |
| FAH     | gene | <i>FAH</i>     | HGNC:3579  |
| FAM111A | gene | <i>FAM111A</i> | HGNC:24725 |

|        |      |               |            |
|--------|------|---------------|------------|
| FAM20A | gene | <i>FAM20A</i> | HGNC:23015 |
| FAM20C | gene | <i>FAM20C</i> | HGNC:22140 |
| FAM58A | gene | <i>FAM58A</i> | HGNC:28434 |
| FAN1   | gene | <i>FAN1</i>   | HGNC:29170 |
| FAN1   | gene | <i>FAN1</i>   | HGNC:29170 |
| FAT1   | gene | <i>FAT1</i>   | HGNC:3595  |
| FGA    | gene | <i>FGA</i>    | HGNC:3661  |
| FGF23  | gene | <i>FGF23</i>  | HGNC:3680  |
| FN1    | gene | <i>FN1</i>    | HGNC:3778  |
| FOXI1  | gene | <i>FOXI1</i>  | HGNC:3815  |
| FOXP1  | gene | <i>FOXP1</i>  | HGNC:3823  |
| FRAS1  | gene | <i>FRAS1</i>  | HGNC:19185 |
| FREM1  | gene | <i>FREM1</i>  | HGNC:23399 |
| FREM2  | gene | <i>FREM2</i>  | HGNC:25396 |
| GALNT3 | gene | <i>GALNT3</i> | HGNC:4125  |
| GANAB  | gene | <i>GANAB</i>  | HGNC:4138  |
| GATA3  | gene | <i>GATA3</i>  | HGNC:4172  |
| GATA3  | gene | <i>GATA3</i>  | HGNC:4172  |
| GATM   | gene | <i>GATM</i>   | HGNC:4175  |
| GCM2   | gene | <i>GCM2</i>   | HGNC:4198  |
| GDF6   | gene | <i>GDF6</i>   | HGNC:4221  |
| GFRA1  | gene | <i>GFRA1</i>  | HGNC:4243  |
| GLA    | gene | <i>GLA</i>    | HGNC:4296  |
| GLA    | gene | <i>GLA</i>    | HGNC:4296  |
| GLI3   | gene | <i>GLI3</i>   | HGNC:4319  |
| GNA11  | gene | <i>GNA11</i>  | HGNC:4379  |
| GNAS   | gene | <i>GNAS</i>   | HGNC:4392  |
| GON7   | gene | <i>GON7</i>   | HGNC:20356 |
| GPC3   | gene | <i>GPC3</i>   | HGNC:4451  |
| GREB1L | gene | <i>GREB1L</i> | HGNC:31042 |
| GRHPR  | gene | <i>GRHPR</i>  | HGNC:4570  |
| GRIP1  | gene | <i>GRIP1</i>  | HGNC:18708 |
| GSN    | gene | <i>GSN</i>    | HGNC:4620  |
| HAAO   | gene | <i>HAAO</i>   | HGNC:4796  |
| HNF1B  | gene | <i>HNF1B</i>  | HGNC:11630 |
| HNF1B  | gene | <i>HNF1B</i>  | HGNC:11630 |
| HNF1B  | gene | <i>HNF1B</i>  | HGNC:11630 |
| HNF1B  | gene | <i>HNF1B</i>  | HGNC:11630 |
| HNF4A  | gene | <i>HNF4A</i>  | HGNC:5024  |
| HOGA1  | gene | <i>HOGA1</i>  | HGNC:25155 |
| HOXA13 | gene | <i>HOXA13</i> | HGNC:5102  |
| HPRT1  | gene | <i>HPRT1</i>  | HGNC:5157  |

|         |      |                |            |
|---------|------|----------------|------------|
| HPSE2   | gene | <i>HPSE2</i>   | HGNC:18374 |
| HS2ST1  | gene | <i>HS2ST1</i>  | HGNC:5193  |
| HSD11B2 | gene | <i>HSD11B2</i> | HGNC:5209  |
| HSD3B2  | gene | <i>HSD3B2</i>  | HGNC:5218  |
| HSPA9   | gene | <i>HSPA9</i>   | HGNC:5244  |
| IFT122  | gene | <i>IFT122</i>  | HGNC:13556 |
| IFT140  | gene | <i>IFT140</i>  | HGNC:29077 |
| IFT140  | gene | <i>IFT140</i>  | HGNC:29077 |
| IFT172  | gene | <i>IFT172</i>  | HGNC:30391 |
| IFT27   | gene | <i>IFT27</i>   | HGNC:18626 |
| IFT43   | gene | <i>IFT43</i>   | HGNC:29669 |
| IFT74   | gene | <i>IFT74</i>   | HGNC:21424 |
| INF2    | gene | <i>INF2</i>    | HGNC:23791 |
| INPP5E  | gene | <i>INPP5E</i>  | HGNC:21474 |
| INVS    | gene | <i>INVS</i>    | HGNC:17870 |
| IQCB1   | gene | <i>IQCB1</i>   | HGNC:28949 |
| ITGA3   | gene | <i>ITGA3</i>   | HGNC:6139  |
| ITGA8   | gene | <i>ITGA8</i>   | HGNC:6144  |
| ITSN1   | gene | <i>ITSN1</i>   | HGNC:6183  |
| ITSN2   | gene | <i>ITSN2</i>   | HGNC:6184  |
| JAG1    | gene | <i>JAG1</i>    | HGNC:6188  |
| KANK2   | gene | <i>KANK2</i>   | HGNC:29300 |
| KCNA1   | gene | <i>KCNA1</i>   | HGNC:6218  |
| KCNJ1   | gene | <i>KCNJ1</i>   | HGNC:6255  |
| KCNJ10  | gene | <i>KCNJ10</i>  | HGNC:6256  |
| KCNJ16  | gene | <i>KCNJ16</i>  | HGNC:6262  |
| KCNJ5   | gene | <i>KCNJ5</i>   | HGNC:6266  |
| KDM6A   | gene | <i>KDM6A</i>   | HGNC:12637 |
| KIF14   | gene | <i>KIF14</i>   | HGNC:19181 |
| KLHL3   | gene | <i>KLHL3</i>   | HGNC:6354  |
| KMT2D   | gene | <i>KMT2D</i>   | HGNC:7133  |
| KYNU    | gene | <i>KYNU</i>    | HGNC:6469  |
| LAGE3   | gene | <i>LAGE3</i>   | HGNC:26058 |
| LAMA5   | gene | <i>LAMA5</i>   | HGNC:6485  |
| LAMB2   | gene | <i>LAMB2</i>   | HGNC:6487  |
| LCAT    | gene | <i>LCAT</i>    | HGNC:6522  |
| LCAT    | gene | <i>LCAT</i>    | HGNC:6522  |
| LIFR    | gene | <i>LIFR</i>    | HGNC:6597  |
| LMX1B   | gene | <i>LMX1B</i>   | HGNC:6654  |
| LRIG2   | gene | <i>LRIG2</i>   | HGNC:20889 |
| LRP2    | gene | <i>LRP2</i>    | HGNC:6694  |
| LRP4    | gene | <i>LRP4</i>    | HGNC:6696  |

|         |      |                |            |
|---------|------|----------------|------------|
| LYZ     | gene | <i>LYZ</i>     | HGNC:6740  |
| LZTFL1  | gene | <i>LZTFL1</i>  | HGNC:6741  |
| MAFB    | gene | <i>MAFB</i>    | HGNC:6408  |
| MAGED2  | gene | <i>MAGED2</i>  | HGNC:16353 |
| MAGI2   | gene | <i>MAGI2</i>   | HGNC:18957 |
| MAPKBP1 | gene | <i>MAPKBP1</i> | HGNC:29536 |
| MEN1    | gene | <i>MEN1</i>    | HGNC:7010  |
| MKKS    | gene | <i>MKKS</i>    | HGNC:7108  |
| MKS1    | gene | <i>MKS1</i>    | HGNC:7121  |
| MMACHC  | gene | <i>MMACHC</i>  | HGNC:24525 |
| MOCOS   | gene | <i>MOCOS</i>   | HGNC:18234 |
| MUC1    | gene | <i>MUC1</i>    | HGNC:7508  |
| MUC1    | gene | <i>MUC1</i>    | HGNC:7508  |
| MUT     | gene | <i>MUT</i>     | HGNC:7526  |
| MYH9    | gene | <i>MYH9</i>    | HGNC:7579  |
| MYH9    | gene | <i>MYH9</i>    | HGNC:7579  |
| MYO1E   | gene | <i>MYO1E</i>   | HGNC:7599  |
| MYOCD   | gene | <i>MYOCD</i>   | HGNC:16067 |
| NADSYN1 | gene | <i>NADSYN1</i> | HGNC:29832 |
| NEK1    | gene | <i>NEK1</i>    | HGNC:7744  |
| NEK8    | gene | <i>NEK8</i>    | HGNC:13387 |
| NEK8    | gene | <i>NEK8</i>    | HGNC:13387 |
| NFIA    | gene | <i>NFIA</i>    | HGNC:7784  |
| NIPBL   | gene | <i>NIPBL</i>   | HGNC:28862 |
| NLRP3   | gene | <i>NLRP3</i>   | HGNC:16400 |
| NOS1AP  | gene | <i>NOS1AP</i>  | HGNC:16859 |
| NOTCH2  | gene | <i>NOTCH2</i>  | HGNC:7882  |
| NPHP1   | gene | <i>NPHP1</i>   | HGNC:7905  |
| NPHP3   | gene | <i>NPHP3</i>   | HGNC:7907  |
| NPHP3   | gene | <i>NPHP3</i>   | HGNC:7907  |
| NPHP4   | gene | <i>NPHP4</i>   | HGNC:19104 |
| NPHS1   | gene | <i>NPHS1</i>   | HGNC:7908  |
| NPHS2   | gene | <i>NPHS2</i>   | HGNC:13394 |
| NPNT    | gene | <i>NPNT</i>    | HGNC:27405 |
| NR3C1   | gene | <i>NR3C1</i>   | HGNC:7978  |
| NR3C2   | gene | <i>NR3C2</i>   | HGNC:7979  |
| NUP107  | gene | <i>NUP107</i>  | HGNC:29914 |
| NUP133  | gene | <i>NUP133</i>  | HGNC:18016 |
| NUP160  | gene | <i>NUP160</i>  | HGNC:18017 |
| NUP85   | gene | <i>NUP85</i>   | HGNC:8734  |
| NUP93   | gene | <i>NUP93</i>   | HGNC:28958 |
| OCRL    | gene | <i>OCRL</i>    | HGNC:8108  |

|          |      |                 |            |
|----------|------|-----------------|------------|
| OCRL     | gene | <i>OCRL</i>     | HGNC:8108  |
| OFD1     | gene | <i>OFD1</i>     | HGNC:2567  |
| OSGEP    | gene | <i>OSGEP</i>    | HGNC:18028 |
| P3H2     | gene | <i>P3H2</i>     | HGNC:19317 |
| PAN2     | gene | <i>PAN2</i>     | HGNC:20074 |
| PAX2     | gene | <i>PAX2</i>     | HGNC:8616  |
| PAX2     | gene | <i>PAX2</i>     | HGNC:8616  |
| PBX1     | gene | <i>PBX1</i>     | HGNC:8632  |
| PCBD1    | gene | <i>PCBD1</i>    | HGNC:8646  |
| PDE3A    | gene | <i>PDE3A</i>    | HGNC:8778  |
| PDSS2    | gene | <i>PDSS2</i>    | HGNC:23041 |
| PHEX     | gene | <i>PHEX</i>     | HGNC:8918  |
| PKD1     | gene | <i>PKD1</i>     | HGNC:9008  |
| PKD2     | gene | <i>PKD2</i>     | HGNC:9009  |
| PKHD1    | gene | <i>PKHD1</i>    | HGNC:9016  |
| PKHD1    | gene | <i>PKHD1</i>    | HGNC:9016  |
| PLCE1    | gene | <i>PLCE1</i>    | HGNC:17175 |
| PMM2     | gene | <i>PMM2</i>     | HGNC:9115  |
| PODXL    | gene | <i>PODXL</i>    | HGNC:9171  |
| PRKCSH   | gene | <i>PRKCSH</i>   | HGNC:9411  |
| PTH      | gene | <i>PTH</i>      | HGNC:9606  |
| PTH1R    | gene | <i>PTH1R</i>    | HGNC:9608  |
| PTPRO    | gene | <i>PTPRO</i>    | HGNC:9678  |
| REN      | gene | <i>REN</i>      | HGNC:9958  |
| REN      | gene | <i>REN</i>      | HGNC:9958  |
| RET      | gene | <i>RET</i>      | HGNC:9967  |
| RET      | gene | <i>RET</i>      | HGNC:9967  |
| RMND1    | gene | <i>RMND1</i>    | HGNC:21176 |
| ROBO1    | gene | <i>ROBO1</i>    | HGNC:10249 |
| ROBO2    | gene | <i>ROBO2</i>    | HGNC:10250 |
| ROR2     | gene | <i>ROR2</i>     | HGNC:10257 |
| RPGRIP1L | gene | <i>RPGRIP1L</i> | HGNC:29168 |
| RRAGD    | gene | <i>RRAGD</i>    | HGNC:19903 |
| RRM2B    | gene | <i>RRM2B</i>    | HGNC:17296 |
| SALL1    | gene | <i>SALL1</i>    | HGNC:10524 |
| SALL4    | gene | <i>SALL4</i>    | HGNC:15924 |
| SARS2    | gene | <i>SARS2</i>    | HGNC:17697 |
| SCARB2   | gene | <i>SCARB2</i>   | HGNC:1665  |
| SCLT1    | gene | <i>SCLT1</i>    | HGNC:26406 |
| SCN4A    | gene | <i>SCN4A</i>    | HGNC:10591 |
| SCNN1A   | gene | <i>SCNN1A</i>   | HGNC:10599 |
| SCNN1B   | gene | <i>SCNN1B</i>   | HGNC:10600 |

|          |      |                 |            |
|----------|------|-----------------|------------|
| SCNN1G   | gene | <i>SCNN1G</i>   | HGNC:10602 |
| SDCCAG8  | gene | <i>SDCCAG8</i>  | HGNC:10671 |
| SEC61A1  | gene | <i>SEC61A1</i>  | HGNC:18276 |
| SEC63    | gene | <i>SEC63</i>    | HGNC:21082 |
| SGPL1    | gene | <i>SGPL1</i>    | HGNC:10817 |
| SHROOM4  | gene | <i>SHROOM4</i>  | HGNC:29215 |
| SLC12A1  | gene | <i>SLC12A1</i>  | HGNC:10910 |
| SLC12A3  | gene | <i>SLC12A3</i>  | HGNC:10912 |
| SLC20A1  | gene | <i>SLC20A1</i>  | HGNC:10946 |
| SLC22A12 | gene | <i>SLC22A12</i> | HGNC:17989 |
| SLC2A2   | gene | <i>SLC2A2</i>   | HGNC:11006 |
| SLC2A9   | gene | <i>SLC2A9</i>   | HGNC:13446 |
| SLC34A1  | gene | <i>SLC34A1</i>  | HGNC:11019 |
| SLC34A3  | gene | <i>SLC34A3</i>  | HGNC:20305 |
| SLC36A2  | gene | <i>SLC36A2</i>  | HGNC:18762 |
| SLC3A1   | gene | <i>SLC3A1</i>   | HGNC:11025 |
| SLC4A1   | gene | <i>SLC4A1</i>   | HGNC:11027 |
| SLC4A4   | gene | <i>SLC4A4</i>   | HGNC:11030 |
| SLC5A2   | gene | <i>SLC5A2</i>   | HGNC:11037 |
| SLC6A19  | gene | <i>SLC6A19</i>  | HGNC:27960 |
| SLC6A20  | gene | <i>SLC6A20</i>  | HGNC:30927 |
| SLC7A7   | gene | <i>SLC7A7</i>   | HGNC:11065 |
| SLC7A9   | gene | <i>SLC7A9</i>   | HGNC:11067 |
| SMARCAL1 | gene | <i>SMARCAL1</i> | HGNC:11102 |
| SON      | gene | <i>SON</i>      | HGNC:11183 |
| STRA6    | gene | <i>STRA6</i>    | HGNC:30650 |
| STRADA   | gene | <i>STRADA</i>   | HGNC:30172 |
| STX16    | gene | <i>STX16</i>    | HGNC:11431 |
| TBC1D1   | gene | <i>TBC1D1</i>   | HGNC:11578 |
| TBC1D8B  | gene | <i>TBC1D8B</i>  | HGNC:24715 |
| TBCE     | gene | <i>TBCE</i>     | HGNC:11582 |
| TBX18    | gene | <i>TBX18</i>    | HGNC:11595 |
| TBX6     | gene | <i>TBX6</i>     | HGNC:11605 |
| TCTN2    | gene | <i>TCTN2</i>    | HGNC:25774 |
| TCTN3    | gene | <i>TCTN3</i>    | HGNC:24519 |
| TFAP2A   | gene | <i>TFAP2A</i>   | HGNC:11742 |
| TMEM138  | gene | <i>TMEM138</i>  | HGNC:26944 |
| TMEM216  | gene | <i>TMEM216</i>  | HGNC:25018 |
| TMEM231  | gene | <i>TMEM231</i>  | HGNC:37234 |
| TMEM237  | gene | <i>TMEM237</i>  | HGNC:14432 |
| TMEM260  | gene | <i>TMEM260</i>  | HGNC:20185 |
| TMEM67   | gene | <i>TMEM67</i>   | HGNC:28396 |

|          |      |                 |            |
|----------|------|-----------------|------------|
| TNS2     | gene | <i>TNS2</i>     | HGNC:19737 |
| TOP2B    | gene | <i>TOP2B</i>    | HGNC:11990 |
| TP53RK   | gene | <i>TP53RK</i>   | HGNC:16197 |
| TPRKB    | gene | <i>TPRKB</i>    | HGNC:24259 |
| TRAF3IP1 | gene | <i>TRAF3IP1</i> | HGNC:17861 |
| TRAP1    | gene | <i>TRAP1</i>    | HGNC:16264 |
| TRIM8    | gene | <i>TRIM8</i>    | HGNC:15579 |
| TRPC6    | gene | <i>TRPC6</i>    | HGNC:12338 |
| TRPM6    | gene | <i>TRPM6</i>    | HGNC:17995 |
| TSC1     | gene | <i>TSC1</i>     | HGNC:12362 |
| TSC2     | gene | <i>TSC2</i>     | HGNC:12363 |
| TSEN2    | gene | <i>TSEN2</i>    | HGNC:28422 |
| TTC21B   | gene | <i>TTC21B</i>   | HGNC:25660 |
| TTC21B   | gene | <i>TTC21B</i>   | HGNC:25660 |
| TTC8     | gene | <i>TTC8</i>     | HGNC:20087 |
| TULP3    | gene | <i>TULP3</i>    | HGNC:12425 |
| TXNDC15  | gene | <i>TXNDC15</i>  | HGNC:20652 |
| UMOD     | gene | <i>UMOD</i>     | HGNC:12559 |
| UMOD     | gene | <i>UMOD</i>     | HGNC:12559 |
| UMOD     | gene | <i>UMOD</i>     | HGNC:12559 |
| VDR      | gene | <i>VDR</i>      | HGNC:12679 |
| VHL      | gene | <i>VHL</i>      | HGNC:12687 |
| VIPAS39  | gene | <i>VIPAS39</i>  | HGNC:20347 |
| VPS33B   | gene | <i>VPS33B</i>   | HGNC:12712 |
| WBP11    | gene | <i>WBP11</i>    | HGNC:16461 |
| WDPCP    | gene | <i>WDPCP</i>    | HGNC:28027 |
| WDR19    | gene | <i>WDR19</i>    | HGNC:18340 |
| WDR35    | gene | <i>WDR35</i>    | HGNC:29250 |
| WDR44    | gene | <i>WDR44</i>    | HGNC:30512 |
| WDR60    | gene | <i>WDR60</i>    | HGNC:21862 |
| WDR72    | gene | <i>WDR72</i>    | HGNC:26790 |
| WDR73    | gene | <i>WDR73</i>    | HGNC:25928 |
| WLS      | gene | <i>WLS</i>      | HGNC:30238 |
| WNK1     | gene | <i>WNK1</i>     | HGNC:14540 |
| WNK4     | gene | <i>WNK4</i>     | HGNC:14544 |
| WNT5A    | gene | <i>WNT5A</i>    | HGNC:12784 |
| WT1      | gene | <i>WT1</i>      | HGNC:12796 |
| XDH      | gene | <i>XDH</i>      | HGNC:12805 |
| XPNPEP3  | gene | <i>XPNPEP3</i>  | HGNC:28052 |
| YRDC     | gene | <i>YRDC</i>     | HGNC:28905 |
| ZIC3     | gene | <i>ZIC3</i>     | HGNC:12874 |
| ZMYM2    | gene | <i>ZMYM2</i>    | HGNC:12989 |



The complete list of genes with the strongest evidence (green colored in PanelApp Australia) for their association with Mendelian renal disease is provided. HGCN, HUGO Gene Nomenclature Committee.

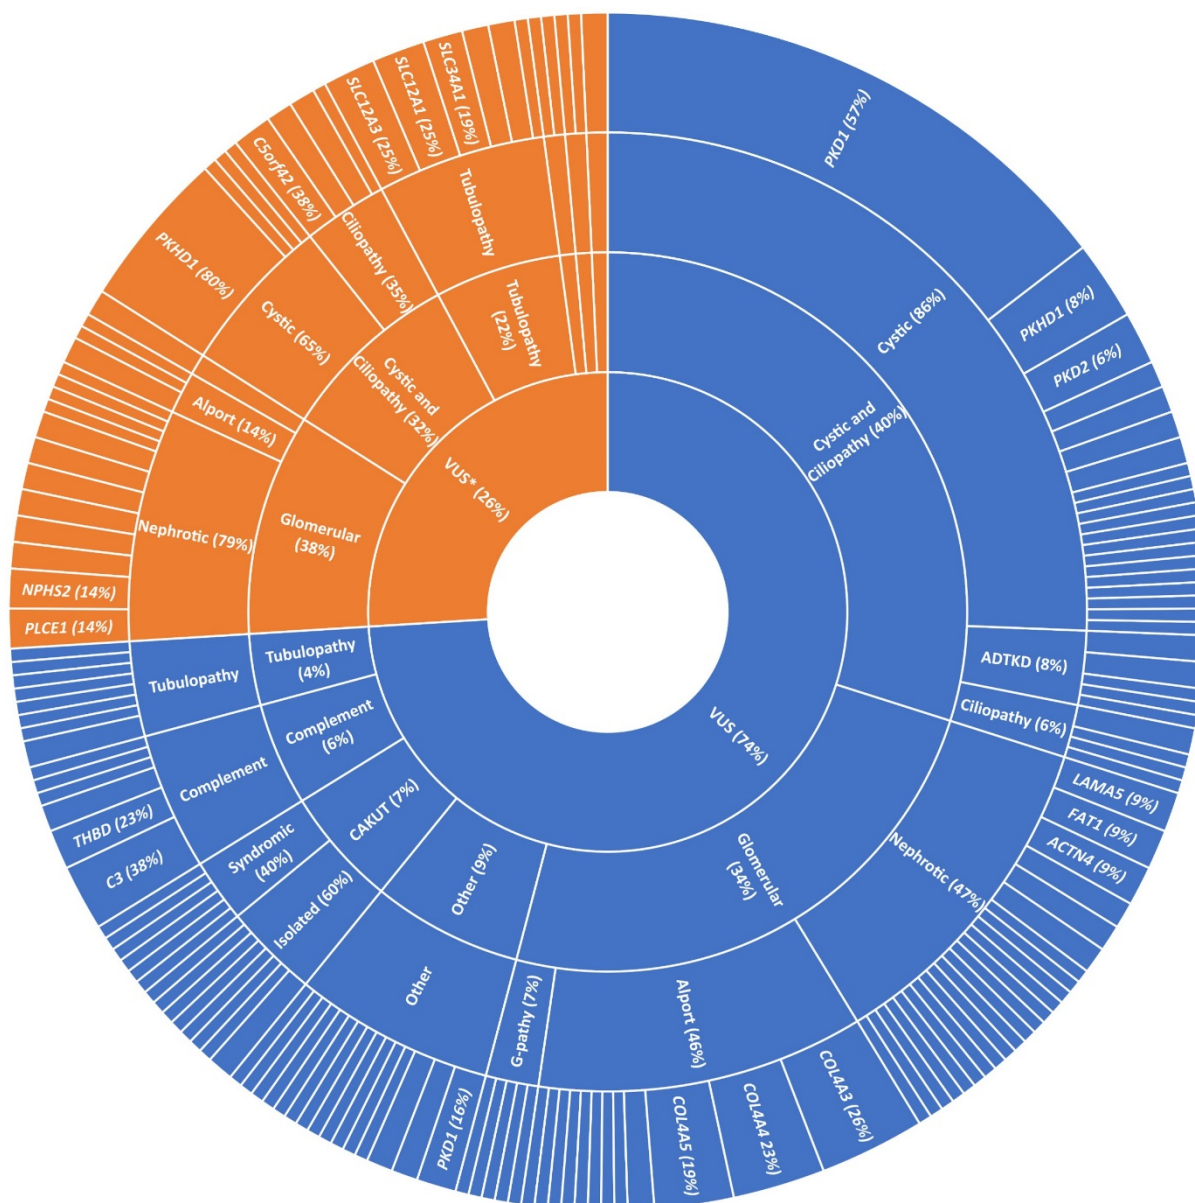

**Supplementary Figure S1: Genes with VUS/VUS\* identified in the national KidGen cohort.** The genes are stratified by clinical diagnosis, with the width of the cut-outs indicating the number of appearances. VUS is a variant of uncertain significance; VUS\* is a VUS with suspected clinical relevance.

STROBE Statement—Checklist of items that should be included in reports of *cohort studies*

|                              | <b>Item No</b> | <b>Recommendation</b>                                                                                                                                                                                                 | <b>Page No</b> |
|------------------------------|----------------|-----------------------------------------------------------------------------------------------------------------------------------------------------------------------------------------------------------------------|----------------|
| <b>Title and abstract</b>    | 1              | (a) Indicate the study's design with a commonly used term in the title or the abstract                                                                                                                                | 1              |
|                              |                | (b) Provide in the abstract an informative and balanced summary of what was done and what was found                                                                                                                   | 5              |
| <b>Introduction</b>          |                |                                                                                                                                                                                                                       |                |
| Background/rationale         | 2              | Explain the scientific background and rationale for the investigation being reported                                                                                                                                  | 6              |
| Objectives                   | 3              | State specific objectives, including any prespecified hypotheses                                                                                                                                                      | 7              |
| <b>Methods</b>               |                |                                                                                                                                                                                                                       |                |
| Study design                 | 4              | Present key elements of study design early in the paper                                                                                                                                                               | 7-8            |
| Setting                      | 5              | Describe the setting, locations, and relevant dates, including periods of recruitment, exposure, follow-up, and data collection                                                                                       | 9              |
| Participants                 | 6              | (a) Give the eligibility criteria, and the sources and methods of selection of participants. Describe methods of follow-up<br><br>(b) For matched studies, give matching criteria and number of exposed and unexposed | 9              |
| Variables                    | 7              | Clearly define all outcomes, exposures, predictors, potential confounders, and effect modifiers. Give diagnostic criteria, if applicable                                                                              | 9-11           |
| Data sources/<br>measurement | 8*             | For each variable of interest, give sources of data and details of methods of assessment (measurement). Describe comparability of assessment methods if there is more than one group                                  | 9-11           |
| Bias                         | 9              | Describe any efforts to address potential sources of bias                                                                                                                                                             | 10             |
| Study size                   | 10             | Explain how the study size was arrived at                                                                                                                                                                             | 10             |
| Quantitative variables       | 11             | Explain how quantitative variables were handled in the analyses. If applicable, describe which groupings were chosen and why                                                                                          | 11             |
| Statistical methods          | 12             | (a) Describe all statistical methods, including those used to control for confounding<br><br>(b) Describe any methods used to examine subgroups and interactions<br><br>(c) Explain how missing data were addressed   | 10             |

|                   |     |                                                                                                                                                                                                                                                                                                                                                                                                                       |       |
|-------------------|-----|-----------------------------------------------------------------------------------------------------------------------------------------------------------------------------------------------------------------------------------------------------------------------------------------------------------------------------------------------------------------------------------------------------------------------|-------|
|                   |     | (d) If applicable, explain how loss to follow-up was addressed                                                                                                                                                                                                                                                                                                                                                        |       |
|                   |     | (e) Describe any sensitivity analyses                                                                                                                                                                                                                                                                                                                                                                                 |       |
| <b>Results</b>    |     |                                                                                                                                                                                                                                                                                                                                                                                                                       |       |
| Participants      | 13* | (a) Report numbers of individuals at each stage of study—eg numbers potentially eligible, examined for eligibility, confirmed eligible, included in the study, completing follow-up, and analysed<br><br>(b) Give reasons for non-participation at each stage<br><br>(c) Consider use of a flow diagram                                                                                                               | 12    |
| Descriptive data  | 14* | (a) Give characteristics of study participants (eg demographic, clinical, social) and information on exposures and potential confounders<br><br>(b) Indicate number of participants with missing data for each variable of interest<br><br>(c) Summarise follow-up time (eg, average and total amount)                                                                                                                | 12    |
| Outcome data      | 15* | Report numbers of outcome events or summary measures over time                                                                                                                                                                                                                                                                                                                                                        | 12-13 |
| Main results      | 16  | (a) Give unadjusted estimates and, if applicable, confounder-adjusted estimates and their precision (eg, 95% confidence interval). Make clear which confounders were adjusted for and why they were included<br><br>(b) Report category boundaries when continuous variables were categorized<br><br>(c) If relevant, consider translating estimates of relative risk into absolute risk for a meaningful time period | 13    |
| Other analyses    | 17  | Report other analyses done—eg analyses of subgroups and interactions, and sensitivity analyses                                                                                                                                                                                                                                                                                                                        | N/A   |
| <b>Discussion</b> |     |                                                                                                                                                                                                                                                                                                                                                                                                                       |       |
| Key results       | 18  | Summarise key results with reference to study objectives                                                                                                                                                                                                                                                                                                                                                              | 14    |
| Limitations       | 19  | Discuss limitations of the study, taking into account sources of potential bias or imprecision. Discuss both direction and magnitude of any potential bias                                                                                                                                                                                                                                                            | 16    |
| Interpretation    | 20  | Give a cautious overall interpretation of results considering objectives, limitations, multiplicity of analyses, results from similar studies, and other relevant evidence                                                                                                                                                                                                                                            | 16    |
| Generalisability  | 21  | Discuss the generalisability (external validity) of the study results                                                                                                                                                                                                                                                                                                                                                 | 17    |

**Other information**

|         |    |                                                                                                                                                               |    |
|---------|----|---------------------------------------------------------------------------------------------------------------------------------------------------------------|----|
| Funding | 22 | Give the source of funding and the role of the funders for the present study and, if applicable, for the original study on which the present article is based | 18 |
|---------|----|---------------------------------------------------------------------------------------------------------------------------------------------------------------|----|

\*Give information separately for exposed and unexposed groups.

**Note:** An Explanation and Elaboration article discusses each checklist item and gives methodological background and published examples of transparent reporting. The STROBE checklist is best used in conjunction with this article (freely available on the Web sites of PLoS Medicine at <http://www.plosmedicine.org/>, Annals of Internal Medicine at <http://www.annals.org/>, and Epidemiology at <http://www.epidem.com/>). Information on the STROBE Initiative is available at <http://www.strobe-statement.org>.
